# Supplementary material for: Fast inline tobacco classification by near-infrared hyperspectral imaging and support vector machine-discriminant analysis
Source: Royal Society of Chemistry journal article supplement (doi:10.1039/c9ay00413k), 2019-01-01
Supplement: c9ay00413k1.pdf [file c9ay00413k1.pdf]

## Electronic Supplementary Information (ESI)

### Fast Inline Tobacco Classification by Near-Infrared Hyperspectral Imaging and Supporting Vector Machines-Discriminant Analysis

Marcelo C. A. Marcelo<sup>a</sup>, Frederico L. F. Soares<sup>a</sup>, Jorge A. Ardila<sup>a</sup>, Jailson C. Dias<sup>a</sup>, Ricardo Pedó<sup>a</sup>, Samuel Kaiser<sup>\*a</sup>, Oscar F. S. Pontes<sup>a</sup>, Carlos E. Pulcinelli<sup>a</sup> and Guilherme P. Sabin<sup>a</sup>

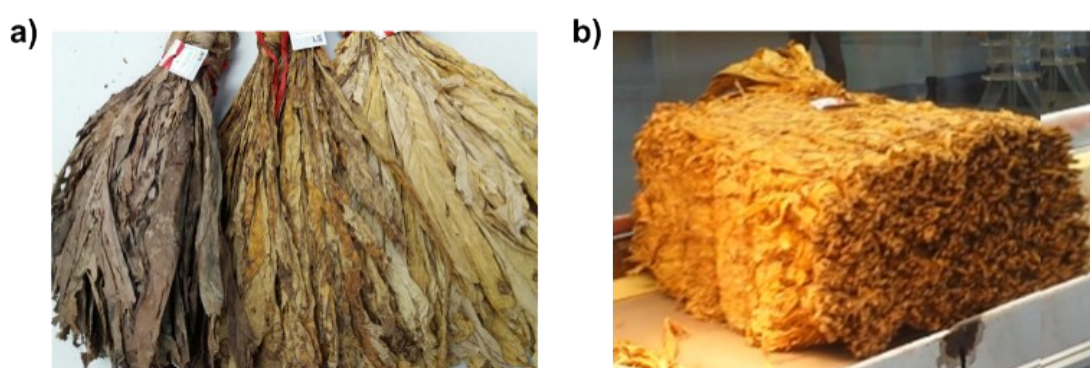

**Figure S1.** a) Bundle of flue-cured Virginia leaves with different colour classes and b) Tobacco bale of flue-cured Virginia at the leaf threshing facility.

**Table S1.** Analyzed flue-cured Virginia dataset stratified by stalk position, leaf colour and leaf quality.

| Classification System | Class          | Number of Bundles | Number of Bales |
|-----------------------|----------------|-------------------|-----------------|
| Stalk Position        | Leaf           | 906               | 26374           |
|                       | Cutters        | 791               | 12770           |
|                       | Lugs           | 694               | 23294           |
|                       | Primings       | 649               | 7535            |
| Leaf Colour           | Pale Lemon     | 488               | 2133            |
|                       | Lemon          | 59                | 3472            |
|                       | Orange         | 1726              | 51317           |
|                       | Light Mahogany | 143               | 1899            |

|              |                                             |     |       |
|--------------|---------------------------------------------|-----|-------|
|              | Mahogany                                    | 624 | 11152 |
| Leaf Quality | High quality, homogeneous and high ripeness | 101 | 103   |
|              | High quality and homogeneous                | 128 | 411   |
|              | High quality, high ripeness                 | 320 | 2413  |
|              | High quality                                | 517 | 19577 |
|              | High quality, low ripeness                  | 64  | 395   |
|              | Medium quality, thick leaf                  | 75  | 1811  |
|              | Medium quality and high ripeness            | 249 | 6564  |
|              | Medium quality and extreme thick leaf       | 133 | 5264  |
|              | Medium quality and low ripeness             | 27  | -     |
|              | Medium quality                              | 24  | 738   |
|              | Medium-low quality                          | 153 | 9712  |
|              | Medium-low quality and high ripeness        | 64  | 4092  |
|              | Medium-low quality and low ripeness         | 122 | 4009  |
|              | Medium-low and heterogeneous                | 403 | 10694 |
|              | Low quality and ripe defects                | 269 | 1413  |
|              | Low quality and high ripeness               | 49  | 376   |
|              | Low quality and overripe                    | 165 | 2085  |
|              | Low quality and unripe                      | 59  | 163   |
|              | Low quality and greenish                    | 54  | 153   |
|              | Low quality, dark, overripe and brittle     | 64  | -     |

**Table S2.** Analysed air-cured Burley dataset stratified by stalk position, leaf colour and leaf quality.

| Classification | Class | Number of | Number of |
|----------------|-------|-----------|-----------|
|----------------|-------|-----------|-----------|

| System         |                                             | Bundles         | Bales            |
|----------------|---------------------------------------------|-----------------|------------------|
| Stalk Position | Tips                                        | 12 <sup>a</sup> | 134 <sup>a</sup> |
|                | Leaf                                        | 279             | 11522            |
|                | Cutters                                     | 281             | 8712             |
|                | Lugs                                        | 210             | 8120             |
|                | Primings                                    | 230             | 1907             |
| Leaf Colour    | Light Mahogany                              | 347             | 7633             |
|                | Mahogany                                    | 467             | 22610            |
|                | Dark Mahogany                               | 198             | 152 <sup>a</sup> |
| Leaf Quality   | High quality, homogeneous and high ripeness | 44              | 201              |
|                | High quality, high ripeness                 | 161             | 872              |
|                | High quality                                | 276             | 14203            |
|                | Medium quality, thick leaf                  | 49              | 3811             |
|                | Medium quality and extreme thick leaf       | 10 <sup>a</sup> | -                |
|                | Medium quality and heterogeneous            | 186             | 10345            |
|                | Low quality and ripeness defects            | 237             | 752              |
|                | Low quality and unripe                      | 10 <sup>a</sup> | -                |
|                | Low quality and greenish                    | 39              | 211              |

a: class not included in the model due to low number of samples.

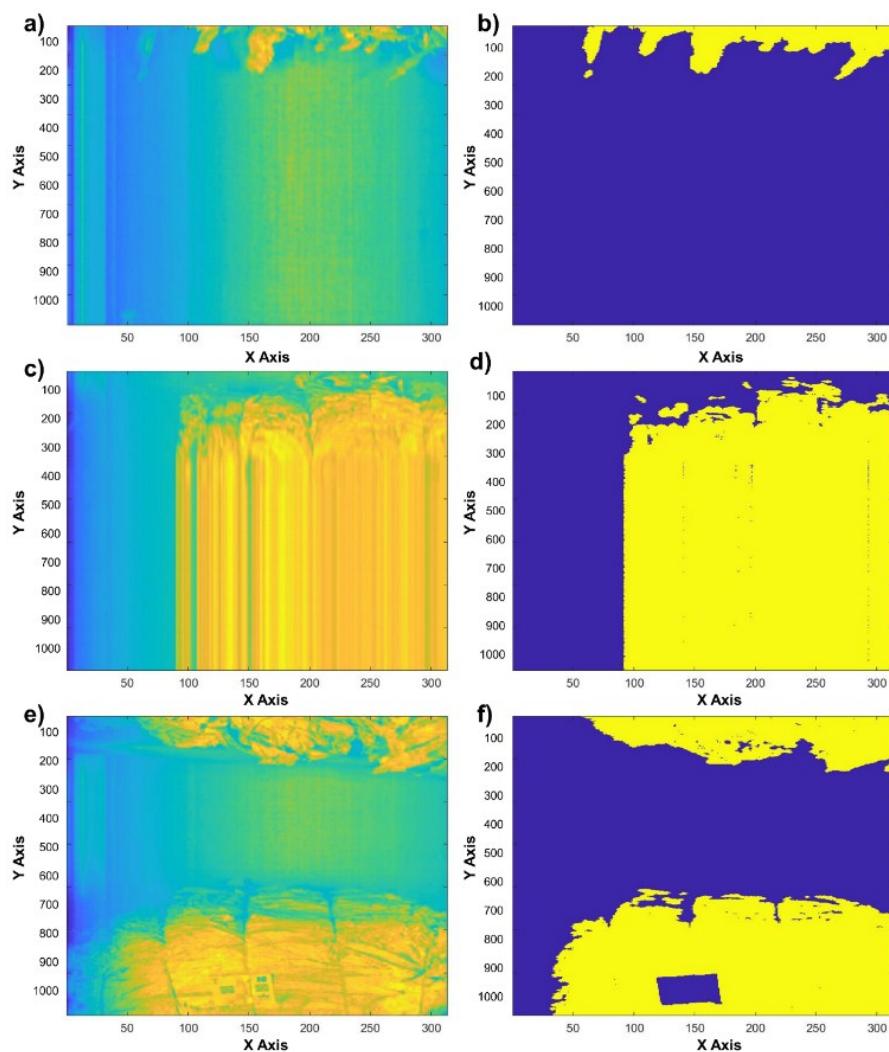

**Figure S2.** Corrected images at 1528.8 nm (a, c and e) and ROI selection (b, d and f) of samples with issues in acquisition: a) and b) Mostly belt conveyor image; c) and d) Sample stopped under the camera; e) and f) Two bales at the same image.
